# Supplementary material for: CoMoS/K catalysts for higher alcohol synthesis from syngas prepared by mechano-chemical activation of molybdenite
Source: Royal Society of Chemistry journal article supplement (doi:10.1039/c3cy00865g), 2014-01-01
Supplement: c3cy00865g.pdf [file c3cy00865g.pdf]

## CoMoS/K catalysts for higher alcohols synthesis from syngas prepared by mechanochemical activation of Molybdenite

*Kalin Simeonov, Jae Hyung Kim, Daniela Ferrari, Gerolamo Budroni, Steven Corthals and Yomaira J. Pagán-Torres*

### 1. Synthesis

50 g of Molybdenite ( $\text{MoS}_2$ , Aldrich) is loaded in a 0.4 L mill jar (Roalox Alumina-Fortified Grinding jar, U.S Stoneware) filled 2/3 of the volume with 6.5 mm  $\times$  6.5 mm size of cylindrical alumina grinding media (US Stoneware) with a mass of 825g. The mill jar is placed in a roller equipped with a ¼ horsepower motor (operational range 20-300 RPM) and the ball milling process is conducted with 200 rpm of rolling speed for different durations (24h, 48h, 72h, 1, 2, 3 and 4 weeks).

Cobalt sulfide is prepared by co-precipitating 24 ml of 1.17 M aqueous solution of  $\text{Co}(\text{NO}_3)_2 \cdot 6\text{H}_2\text{O}$  (0.495 mg Co/mg) with 11 ml of 20% aqueous solution of  $(\text{NH}_4)_2\text{S}$ . The precipitate is filtered using a vacuum pump and Whatman Grade 3 (6  $\mu\text{m}$ ) qualitative filter paper, dried at 50°C for 4 hours and calcined at 500°C under  $\text{N}_2$  flow (200 ml/min) and heating rate of 2.5°C/min in a muffle furnace equipped with an enclosed stainless steel compartment. Ball-milled  $\text{MoS}_2$ , cobalt sulfide and  $\text{K}_2\text{CO}_3$  are mixed in a mortar with pestle to obtain  $\text{Mo/Co} = 2$  (mol/mol).  $\text{K}_2\text{CO}_3$  amounts to 10 wt% based on the final catalyst weight. The finished catalysts are potassium promoted cobalt molybdenum sulfides.

### 2. Characterization

All different ball-milled  $\text{MoS}_2$  are characterized by XRD using Scintag X1 with  $\text{Cu K}\alpha = 1.5406$  and 2°/min of scan rate. The mean crystallite size is calculated based on Scherrer equation.

The  $\text{N}_2$  sorption measurements are performed using TriStar II 3020 instrument equipped with a SmartPrep 065, both from Micromeritics. The samples are pretreated under nitrogen at 200°C for 2h using a heating ramp rate of 10°C/min. The TriStar is designed to measure surface area, pore volume and pore distributions.

$\text{N}_2$  adsorption-desorption isotherms are shown in Figure S1. All plots show the Type III isotherm.

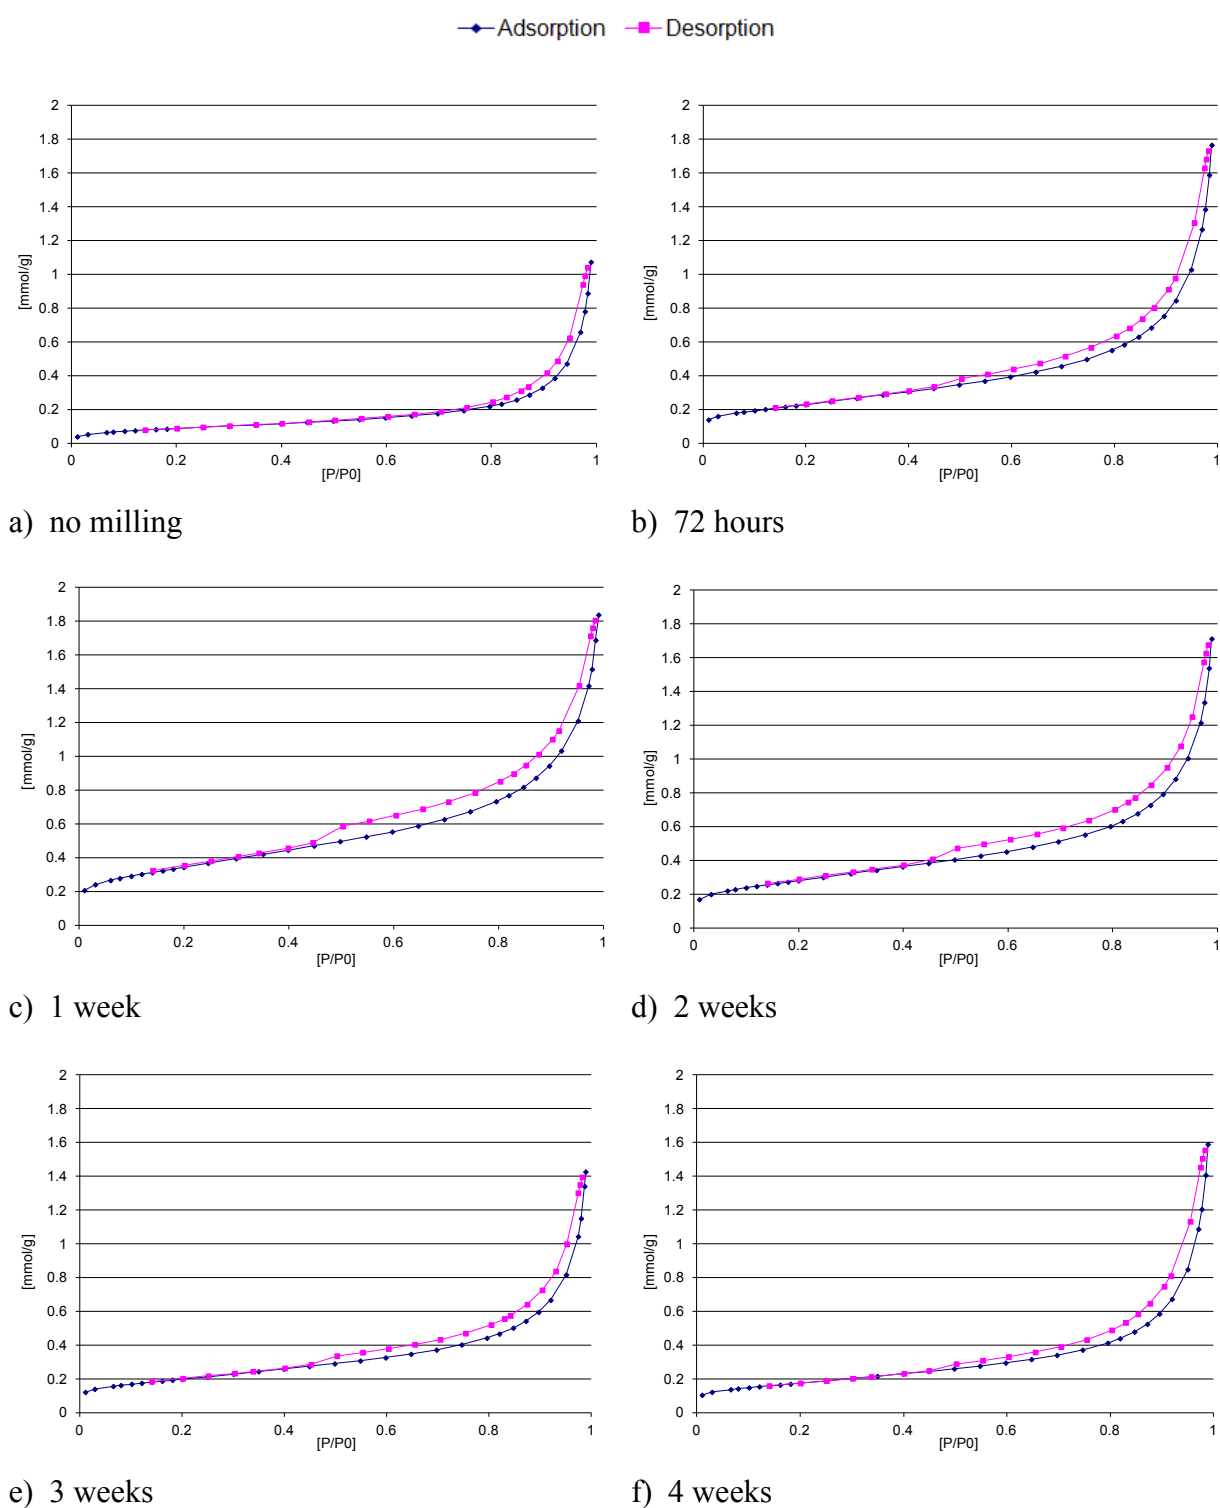

**Figure S1.** N<sub>2</sub> Adsorption-desorption isotherms of ball milled samples.

For the SEM measurements, the samples are mounted through a carbon pad onto aluminum SEM stubs. Cross-sectional samples are coated with 10 nm of Cr prior to analysis. The SEM imaging is performed using the FEI 30 XL-FEG SEM.

The HR-TEM (high resolution transmission electron microscopy) are performed using a HRTEM JEOL JEM-2200FS equipped with:

Schottky type field emission gun (FEG)

imaging system aberration corrector (Cs-corrector) from CEOS GmbH

slow scan CCD camera US 1000 Gatan Co, 2048x2048 pixels

HR-TEM mode: point resolution = information limit (at Cs < 5  $\mu\text{m}$ ) = 0.13 nm

The TEM analyses are performed at Gent University, Department of Materials Sciences.

### 3. Catalytic Testing

The catalysts are tested in a high-pressure parallel fixed bed reactor. The quartz reactors are loaded with 250  $\mu\text{l}$  of catalyst and tested with syngas ( $\text{H}_2/\text{CO}$  molar ratio of 1) at 1500 psi, 290-340  $^\circ\text{C}$  at 3000  $\text{h}^{-1}$  GHSV. Table 1 presents the different products distribution at different reaction conditions. For all conditions and catalysts the carbon balances are close to 100%.

*Table 1. Selectivities (%) to products given at different reaction temperatures. Selectivities to HC (all hydrocarbons, both saturated and unsaturated up to  $\text{C}_6$ ), methane, methanol, ethanol and propanol are  $\text{CO}_2$ -free. Overall  $\text{CO}_2$  selectivity is also presented.*

| Ball mill Time   | T. $^\circ\text{C}$ | C. Conv. | $\text{CO}_2$ sel | HC sel. | $\text{CH}_4$ sel | $\text{CH}_3\text{OH}$ sel | $\text{C}_2\text{H}_5\text{OH}$ sel | $\text{C}_3\text{H}_7\text{OH}$ sel |
|------------------|---------------------|----------|-------------------|---------|-------------------|----------------------------|-------------------------------------|-------------------------------------|
| No ball milling  | 330                 | 1.7      | 20.7              | 3.1     | 3.1               | 52.0                       | 27.1                                | 6.3                                 |
|                  | 340                 | 2.2      | 21.8              | 4.5     | 4.5               | 45.1                       | 27.0                                | 6.8                                 |
| 72 hours milling | 290                 | 3.0      | 16.2              | 2.8     | 2.8               | 63.5                       | 24.3                                | 1.7                                 |
|                  | 330                 | 14.5     | 21.5              | 7.7     | 7.2               | 40.2                       | 35.0                                | 4.7                                 |
|                  | 340                 | 18.5     | 24.8              | 10.8    | 9.9               | 32.6                       | 35.5                                | 6.7                                 |
| 1 week milling   | 290                 | 4.5      | 14.2              | 2.5     | 2.5               | 63.8                       | 28.7                                | 1.1                                 |
|                  | 330                 | 19.1     | 21.5              | 8.0     | 7.4               | 39.7                       | 37.5                                | 4.4                                 |
|                  | 340                 | 23.9     | 25.1              | 11.5    | 10.5              | 30.9                       | 39.1                                | 6.8                                 |
| 2 weeks milling  | 290                 | 4.6      | 13.0              | 2.4     | 2.4               | 68.4                       | 22.4                                | 1.0                                 |
|                  | 330                 | 19.7     | 22.1              | 8.6     | 7.7               | 41.1                       | 38.7                                | 4.7                                 |
|                  | 340                 | 23.7     | 25.6              | 11.5    | 10.4              | 31.9                       | 40.6                                | 7.0                                 |
| 3 weeks milling  | 290                 | 5.2      | 11.5              | 2.1     | 2.1               | 69.1                       | 24.7                                | 0.9                                 |
|                  | 330                 | 22.0     | 21.7              | 8.4     | 7.5               | 39.4                       | 41.6                                | 4.6                                 |
|                  | 340                 | 26.4     | 25.4              | 11.7    | 10.4              | 30.0                       | 41.0                                | 7.4                                 |
| 4 weeks milling  | 290                 | 5.5      | 14.3              | 4.9     | 3.7               | 63.4                       | 25.4                                | 2.6                                 |
|                  | 330                 | 22.2     | 24.2              | 12.1    | 8.3               | 35.7                       | 36.6                                | 9.0                                 |
|                  | 340                 | 26.0     | 27.3              | 16.0    | 10.3              | 27.3                       | 35.0                                | 13.8                                |

For comparison we add the catalytic performance of KCoMoS prepared with a conventional

coprecipitation using a more expensive Mo precursor like: ammoniumtetrathiomolybdate.<sup>1</sup>

*Table 2. Selectivities (%) to products given at different reaction temperatures for KCoMoS prepared by coprecipitation. Selectivities to HC (all hydrocarbons, both saturated and unsaturated up to C<sub>6</sub>), methane, methanol, ethanol and propanol are CO<sub>2</sub>-free. Overall CO<sub>2</sub> selectivity is also presented.*

| <b>T. °C</b> | <b>C. Conv.</b> | <b>CO<sub>2</sub> sel</b> | <b>HC sel.</b> | <b>CH<sub>4</sub> sel</b> | <b>CH<sub>3</sub>OH sel</b> | <b>C<sub>2</sub>H<sub>5</sub>OH sel</b> | <b>C<sub>3</sub>H<sub>7</sub>OH sel</b> |
|--------------|-----------------|---------------------------|----------------|---------------------------|-----------------------------|-----------------------------------------|-----------------------------------------|
| 330          | 30.4            | 32.0                      | 23.6           | 12.9                      | 20.4                        | 31.9                                    | 13.9                                    |
| 340          | 35.9            | 35.5                      | 32.3           | 15.7                      | 15.3                        | 24.9                                    | 14.0                                    |

---

<sup>1</sup> D. L.S. Nieskens, D. Ferrari, Y. Liu and R. Kolonko Jr., Catal. commun., 2011, **14**, 111
